# Supplementary material for: Electron-induced fragmentation mechanisms in organic monomers and their implications for photoresist optimization for EUV lithography
Source: Royal Society of Chemistry journal article supplement (doi:10.1039/d1cp00065a), 2021-01-01
Supplement: d1cp00065a1.pdf [file d1cp00065a1.pdf]

## Supporting Information for

### Electron-induced fragmentation mechanisms in organic monomers and their implications on photoresist optimizations for EUV lithography

Ashish Rathore,<sup>a,b,\*</sup> Maicol Cipriani,<sup>c</sup> Ching-Chung Huang,<sup>d</sup> Lionel Amiaud,<sup>e</sup> Céline Dablemont,<sup>e</sup> Anne Lafosse,<sup>e</sup> Oddur Ingólfsson,<sup>c</sup> Danilo De Simone,<sup>b</sup> Stefan De Gendt<sup>a,b</sup>

#### 1. Film-phase electron-induced fragmentation analysis of MIB

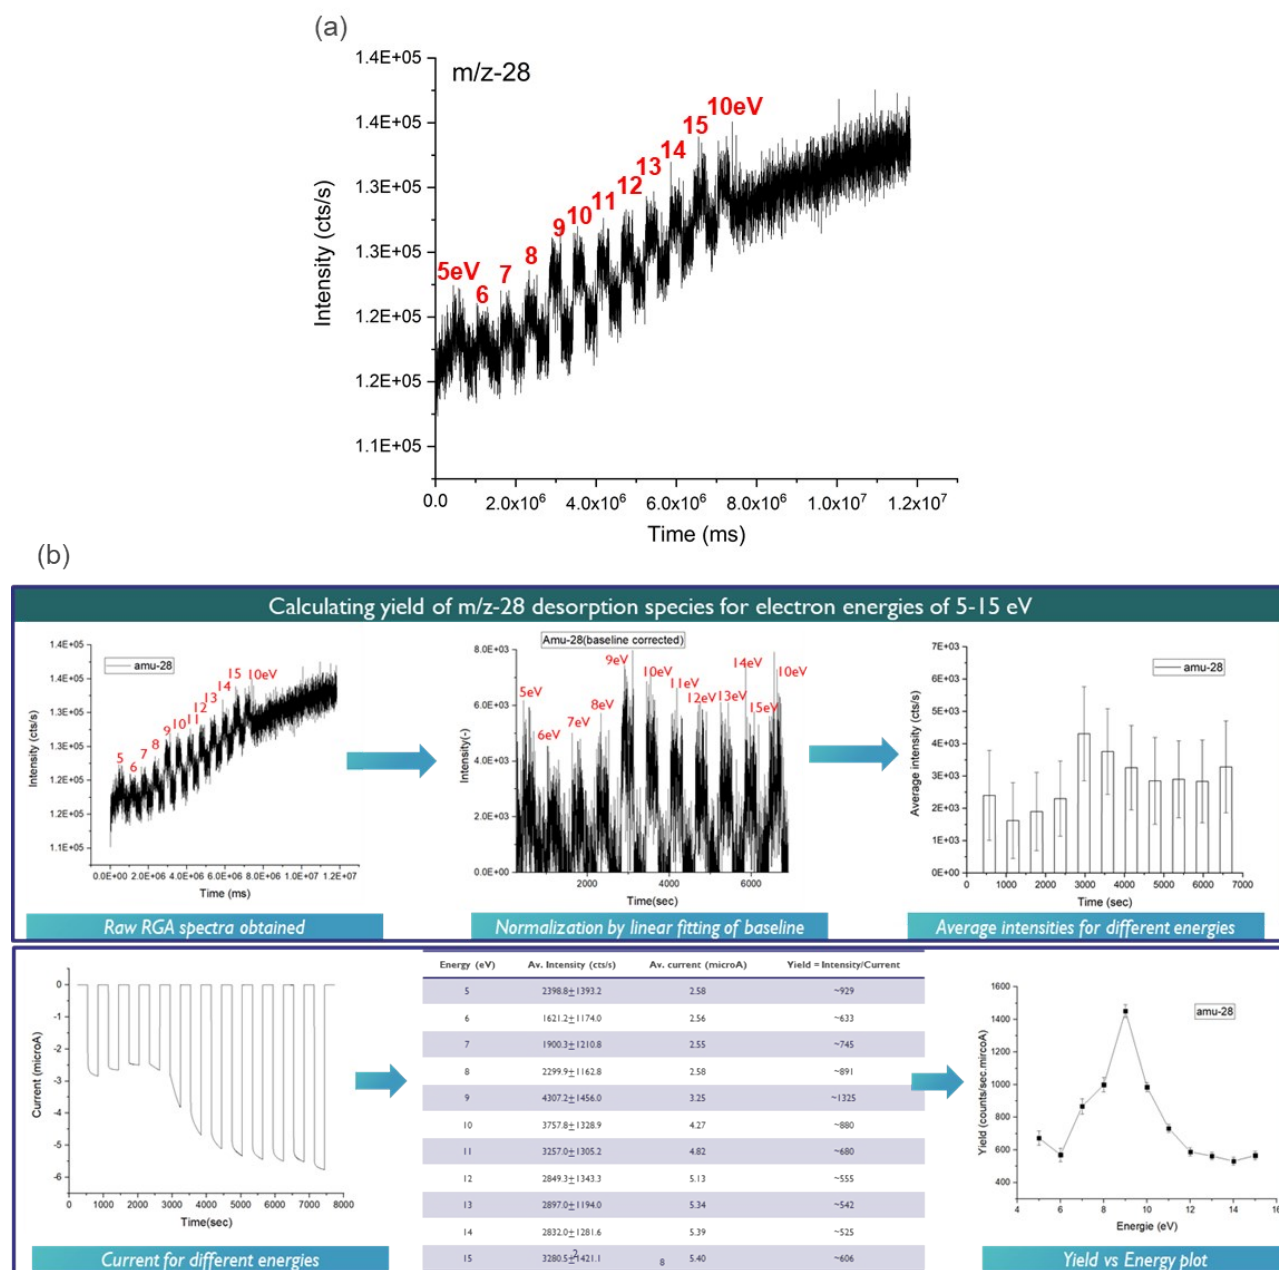

**Fig S1.** (a) Raw RGA spectra (intensity versus time) of m/z-28 obtained during the 5-15 eV ESD experiment. (b) Methodology to calculate yield versus energy plot for m/z-28 from the raw RGA spectra.

|                                                                                                                                                |                                                                                                                                                   |
|------------------------------------------------------------------------------------------------------------------------------------------------|---------------------------------------------------------------------------------------------------------------------------------------------------|
| <p><b>m/z – 102 (Parent molecule)</b></p> 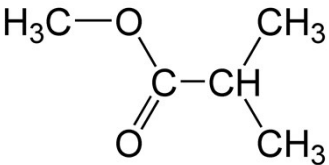                    | <p><b>m/z – 87 (CH<sub>3</sub> loss)</b></p>                    |
| <p><b>m/z – 74 (CO loss)</b></p>                              | <p><b>m/z – 71 (CH<sub>3</sub>O loss)</b></p>                   |
| <p><b>m/z – 59 (CH<sub>3</sub>CHCH<sub>3</sub> loss)</b></p>  | <p><b>m/z – 43 (CH<sub>3</sub>CHCH<sub>3</sub>)-cation</b></p>  |

**Fig S2.** Structures of positive-ion fragments from 70 eV mass spectra obtained for MIB.

| M/z | Rel. intensity %<br>(NIST database) | Rel. intensity %<br>(this study) |
|-----|-------------------------------------|----------------------------------|
| 102 | 18                                  | 19                               |
| 87  | 19                                  | 22                               |
| 74  | 4                                   | 6                                |
| 71  | 40                                  | 42                               |
| 59  | 21                                  | 25                               |
| 43  | 100                                 | 100                              |
| 41  | 30                                  | 52                               |

**Fig S3.** Comparison of the relative intensities of important m/z ratios obtained for MIB for this study with the NIST database. The lower m/z range, i.e., below about m/z 43, is dominated by the contribution from residual gas in the chamber

**TPD of desorption masses**

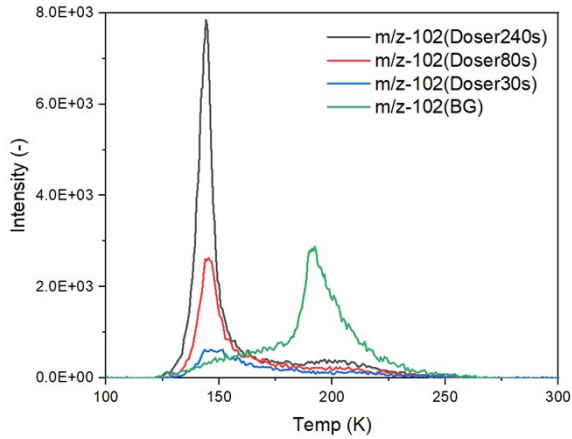

**Calibration curve**

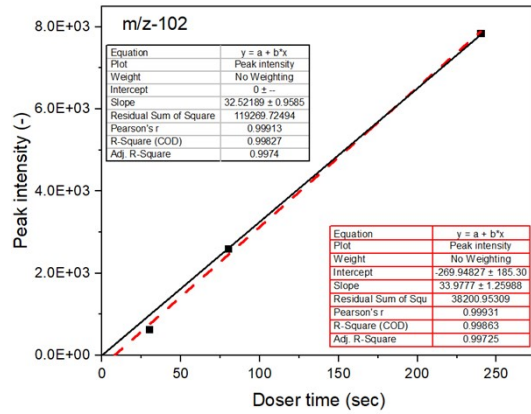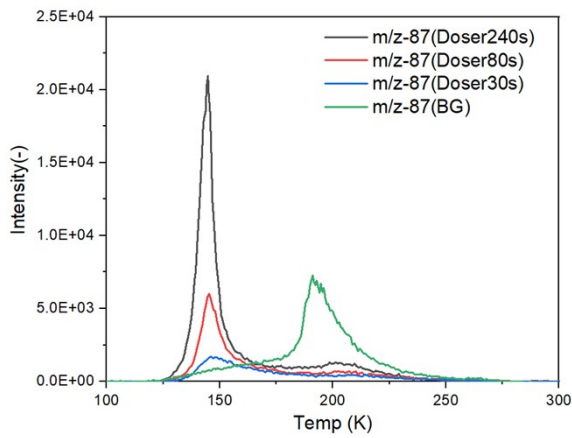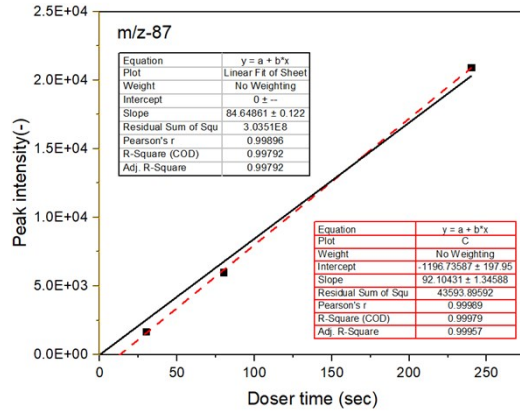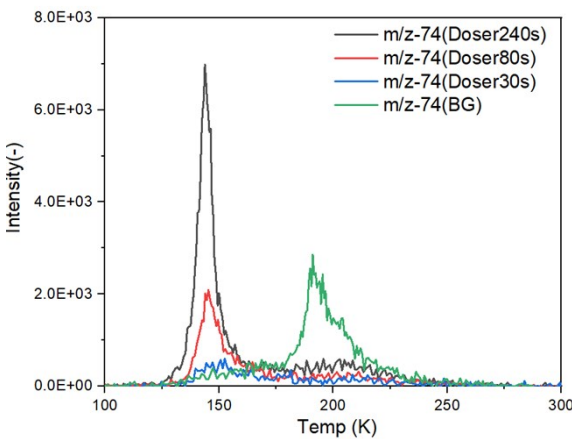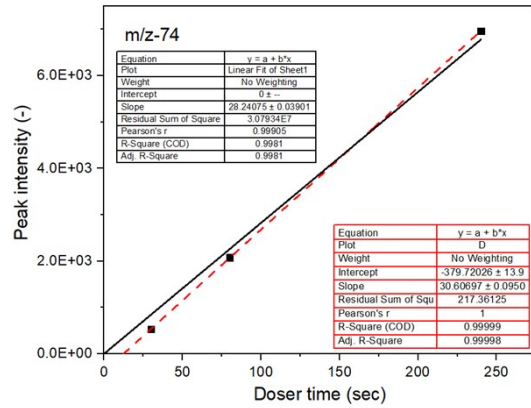

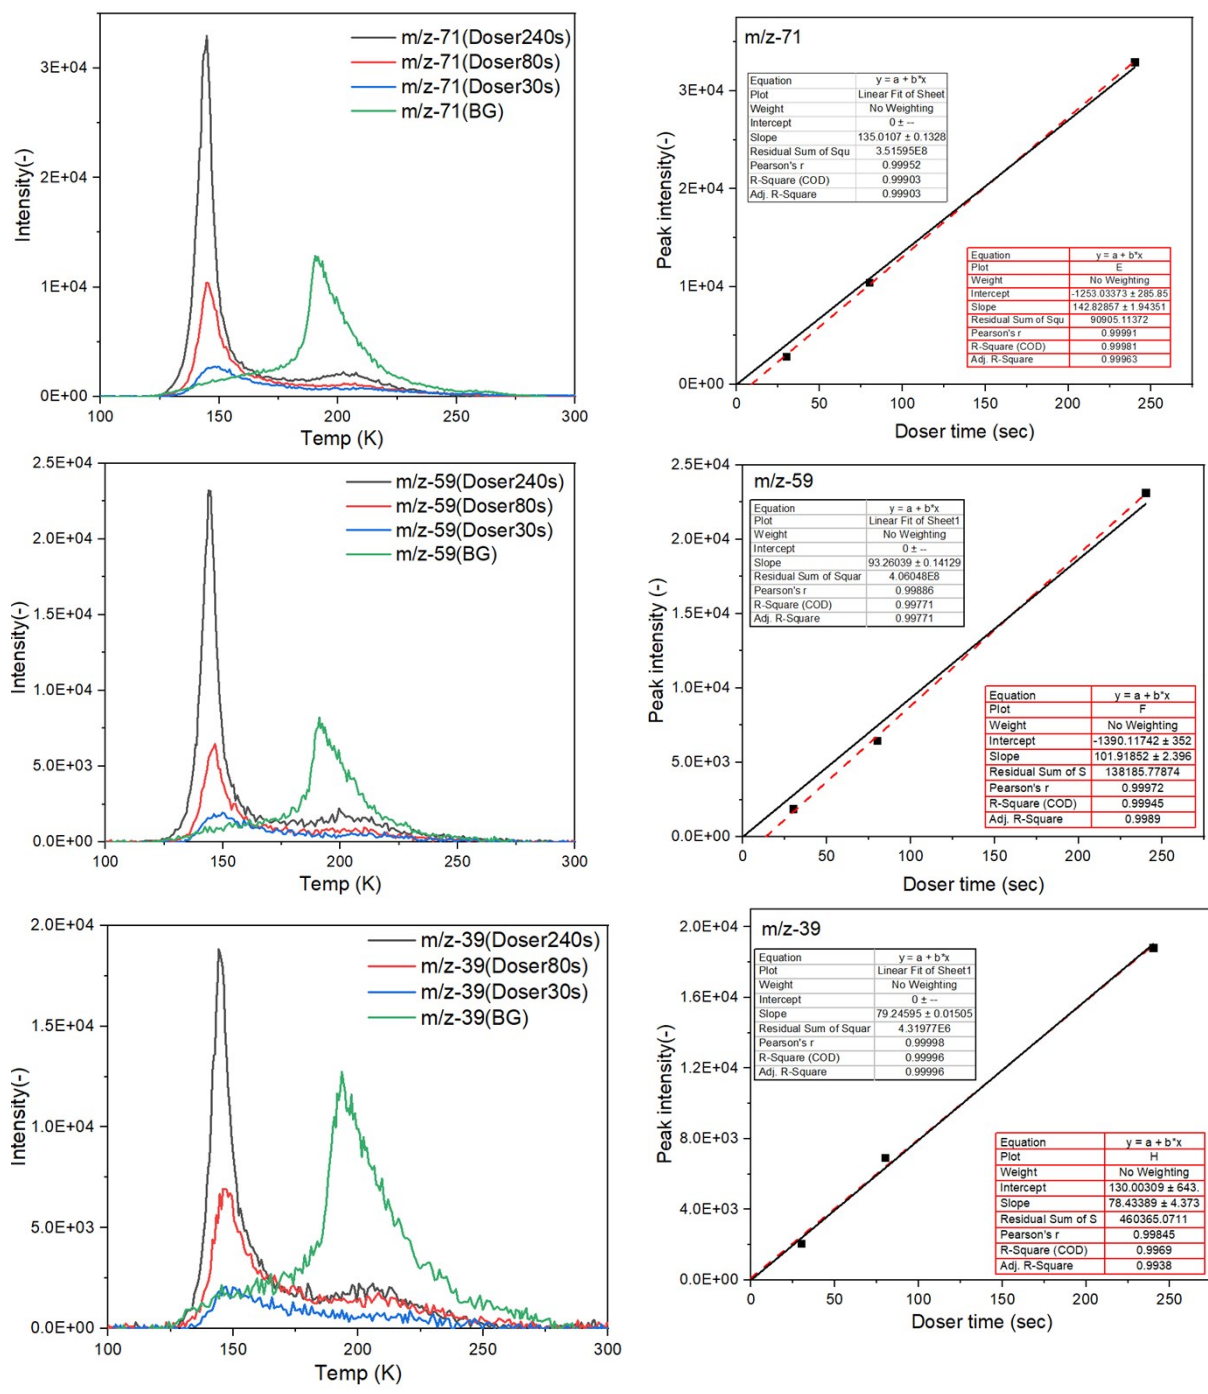

**Fig S4.** TPD (left) and calibration curves (right) of desorption masses of amu-102, 87, 74, 71, 59, and 39 of MIB monomer. The intensity profile of the background (BG) deposition is also provided in green (deposited at a partial pressure of 2E-9 mbar).
